# Supplementary material for: Japanese nationwide observational multicenter study of tumor BRCA1/2 variant testing in advanced ovarian cancer
Source: PubMed Central journal article supplement — Cancer Sci. 2022 Oct 18;114(1):271–80. doi: 10.1111/cas.15518 (PMC9807512; doi:10.1111/cas.15518), 2022-10-18
Supplement: CAS-114-271-s001.pdf [file CAS-114-271-s001.pdf]

## Supporting Information

**Figure S1.** Map of study sites and numbers (%) of patients recruited at each site (per-protocol set;  $n = 205$ )

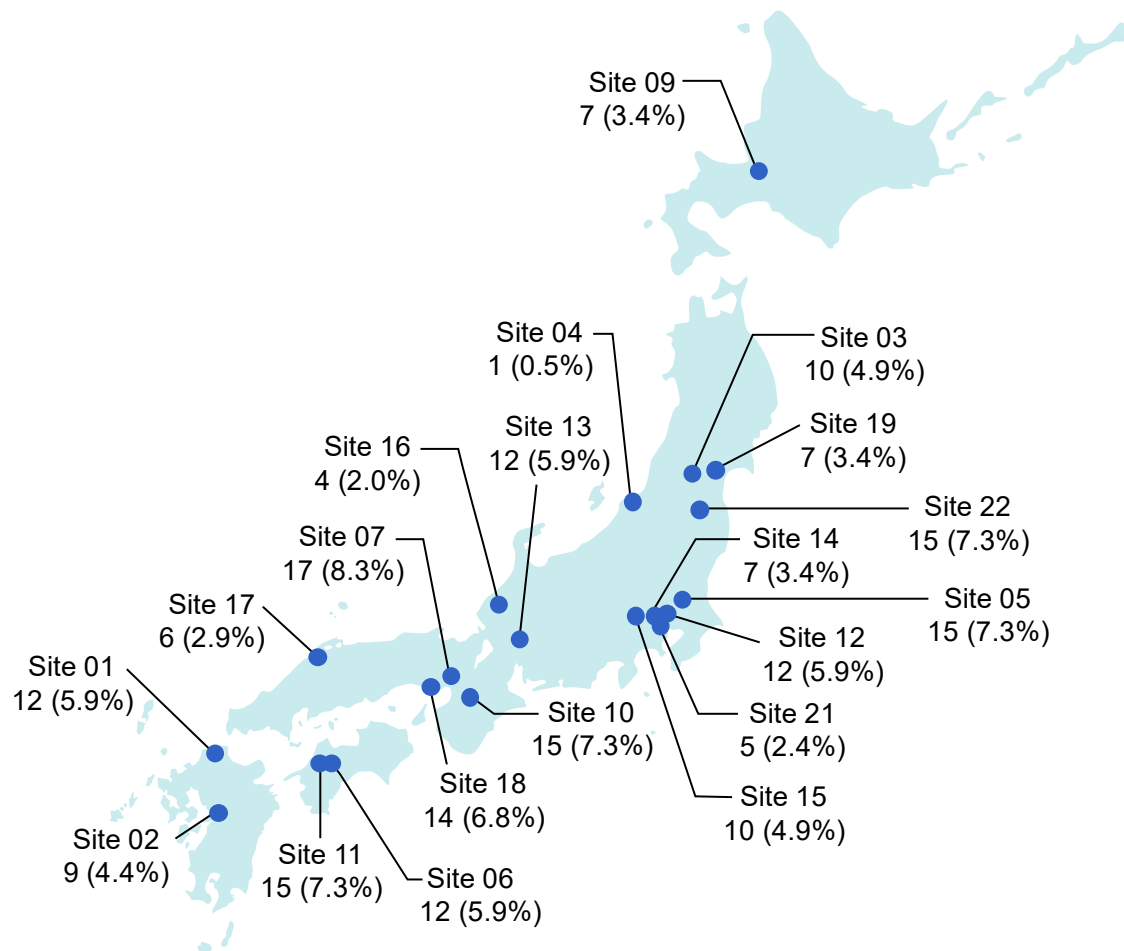

**Figure S2.** Genomic instability score distribution by gBRCAm present, absent, or VUS status (per-protocol set;  $n = 205$ )

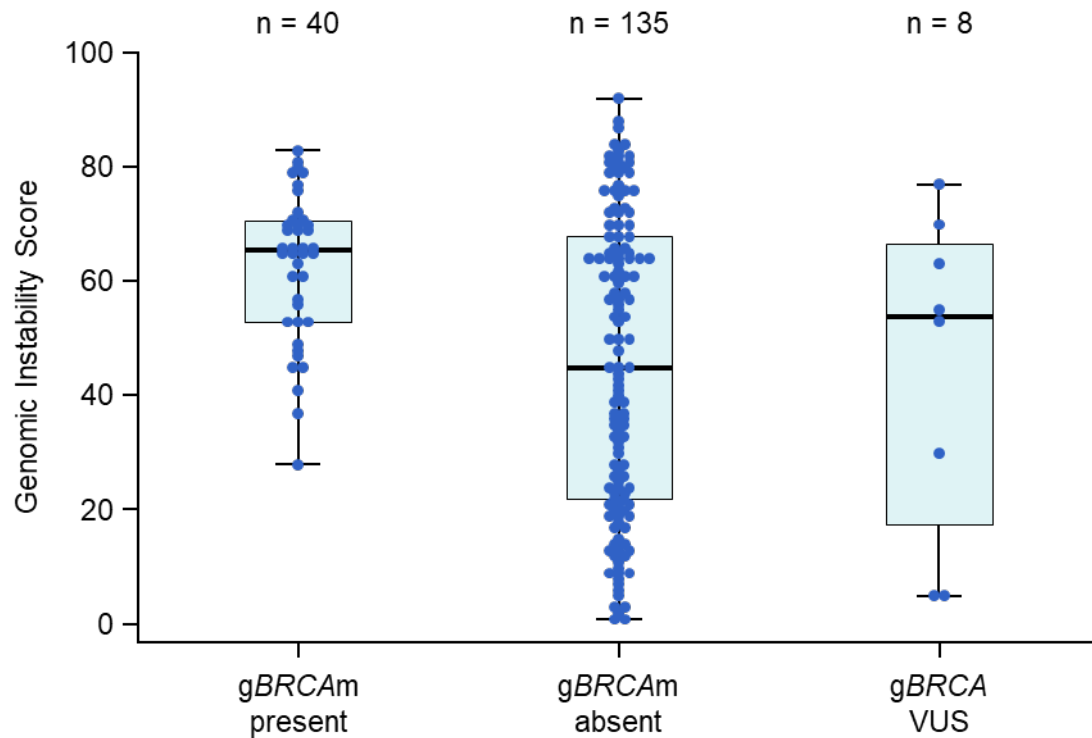

|        |      |      |      |
|--------|------|------|------|
| Q3     | 70.5 | 68.0 | 66.5 |
| Median | 65.5 | 45.0 | 54.0 |
| Q1     | 53.0 | 22.0 | 17.5 |

gBRCAm, germline *BRCA* mutation; Q1, quartile 1; Q3, quartile 3; VUS, variant of uncertain significance.

The circles indicate each patient by mutation. In the box plot, the box height indicates the interquartile range, with Q1 at the bottom and Q3 at the top, and the midline indicates the median.

**Table S1.** List of study sites and numbers (%) of patients recruited at each site

| <b>Site</b> |                                                                     | <b><i>n</i> = 205<sup>a</sup></b><br><b><i>n</i> (%)</b> |
|-------------|---------------------------------------------------------------------|----------------------------------------------------------|
| Site 01     | Hospital of the University of Occupational and Environmental Health | 12 (5.9)                                                 |
| Site 02     | Kumamoto University Hospital                                        | 9 (4.4)                                                  |
| Site 03     | Yamagata University Hospital                                        | 10 (4.9)                                                 |
| Site 04     | Niigata University Medical & Dental Hospital                        | 1 (0.5)                                                  |
| Site 05     | University of Tsukuba Hospital                                      | 15 (7.3)                                                 |
| Site 06     | Ehime University Hospital                                           | 12 (5.9)                                                 |
| Site 07     | Kansai Rosai Hospital                                               | 17 (8.3)                                                 |
| Site 09     | Sapporo Medical University Hospital                                 | 7 (3.4)                                                  |
| Site 10     | Nara Medical University Hospital                                    | 15 (7.3)                                                 |
| Site 11     | National Hospital Organization Shikoku Cancer Center                | 15 (7.3)                                                 |
| Site 12     | The University of Tokyo Hospital                                    | 12 (5.9)                                                 |
| Site 13     | Gifu University Hospital                                            | 12 (5.9)                                                 |
| Site 14     | Keio University Hospital                                            | 7 (3.4)                                                  |
| Site 15     | Japanese Red Cross Musashino Hospital                               | 10 (4.9)                                                 |
| Site 16     | University of Fukui Hospital                                        | 4 (2.0)                                                  |
| Site 17     | Shimane University Hospital                                         | 6 (2.9)                                                  |
| Site 18     | Kobe City Medical Center General Hospital                           | 14 (6.8)                                                 |
| Site 19     | Tohoku University Hospital                                          | 7 (3.4)                                                  |
| Site 21     | The Jikei University Hospital                                       | 5 (2.4)                                                  |
| Site 22     | Fukushima Medical University Hospital                               | 15 (7.3)                                                 |

<sup>a</sup>Per-protocol set.

**Table S2.** Demographic and clinical characteristics of patients

|                               | <i>n</i> = 205 <sup>a</sup><br><i>n</i> (%) |
|-------------------------------|---------------------------------------------|
| <b>Patient factors</b>        |                                             |
| Age, years                    |                                             |
| Mean (SD)                     | 59.4 (10.9)                                 |
| <50                           | 41 (20.0)                                   |
| ≥50 to <65                    | 84 (41.0)                                   |
| ≥65                           | 80 (39.0)                                   |
| Menopausal status             |                                             |
| Post-menopausal               | 151 (73.7)                                  |
| Pre-menopausal                | 51 (24.9)                                   |
| Unknown                       | 3 (1.5)                                     |
| Neoadjuvant chemotherapy      |                                             |
| Yes                           | 39 (19.0)                                   |
| No                            | 166 (81.0)                                  |
| <b>Ovarian cancer factors</b> |                                             |
| Surgical method               |                                             |
| Laparotomy                    | 82 (40.0)                                   |
| Primary debulking surgery     | 76 (37.1)                                   |
| Interval debulking surgery    | 35 (17.1)                                   |
| Laparoscopy                   | 10 (4.9)                                    |
| Others                        | 2 (1.0)                                     |
| Cancer type                   |                                             |
| Epithelial ovarian            | 171 (83.4)                                  |
| Primary peritoneal            | 20 (9.8)                                    |
| Fallopian tube                | 14 (6.8)                                    |
| Histology                     |                                             |
| High-grade serous carcinoma   | 163 (79.5)                                  |
| Endometrioid carcinoma        | 26 (12.7)                                   |
| Clear-cell carcinoma          | 13 (6.3)                                    |
| Others                        | 3 (1.5)                                     |
| FIGO Stage                    |                                             |
| III                           | 137 (66.8)                                  |
| IV                            | 68 (33.2)                                   |

*SD*, standard deviation; *FIGO*, International Federation of Gynecology and Obstetrics.

Values are *n* (%) unless otherwise stated.

<sup>a</sup>Per-protocol set.

**Table S3.** Variant description of tBRCAm

| <b>Variant type</b>  | <b><i>n</i> = 205<sup>a</sup></b> |
|----------------------|-----------------------------------|
|                      | <b><i>n</i> (%)</b>               |
| tBRCA1m              | 36 (17.6)                         |
| Sequencing variants  | 34 (16.6)                         |
| Nonsense             | 15 (7.3)                          |
| Frameshift           | 14 (6.8)                          |
| Missense             | 3 (1.5)                           |
| Splicing-intronic    | 2 (1.0)                           |
| Large rearrangements | 2 (1.0)                           |
| Deletion             | 2 (1.0)                           |
| tBRCA2m              | 19 (9.3)                          |
| Sequencing variants  | 19 (9.3)                          |
| Nonsense             | 8 (3.9)                           |
| Frameshift           | 8 (3.9)                           |
| Splicing-intronic    | 3 (1.5)                           |

tBRCA, tumor BRCA; *m*, mutation.

A patient can have a mutation in several categories.

<sup>a</sup>Per-protocol set.

**Table S4.** Prevalence of tBRCAm by medical history of cancer

| <b>Medical history</b>      | <b><i>n</i> = 205<sup>a</sup></b> | <b>tBRCA1m<br/><i>n</i> (%)</b> | <b>tBRCA2m<br/><i>n</i> (%)</b> |
|-----------------------------|-----------------------------------|---------------------------------|---------------------------------|
| Breast cancer               | 18                                | 9 (50.0)                        | 1 (5.6)                         |
| Ovarian cystoma             | 4                                 | 1 (25.0)                        | 0                               |
| Endometriosis               | 3                                 | 1 (33.3)                        | 0                               |
| Pelvic inflammatory disease | 1                                 | 0                               | 0                               |
| Ovarian cyst                | 1                                 | 0                               | 0                               |
| Other cancer                | 11                                | 2 (18.2)                        | 1 (9.1)                         |
| Thyroid cancer              | 3                                 | 1 (33.3)                        | 0                               |
| Gastric cancer              | 2                                 | 1 (50.0)                        | 0                               |
| Uterine cancer              | 2                                 | 0                               | 1 (50.0)                        |
| Colon cancer                | 1                                 | 1 (100.0)                       | 0                               |
| Renal cancer                | 1                                 | 0                               | 0                               |
| Leukemia                    | 1                                 | 0                               | 0                               |
| Endometrial cancer          | 1                                 | 0                               | 0                               |
| Brain neoplasm              | 1                                 | 0                               | 0                               |

tBRCA, tumor BRCA; *m*, mutation.

Percentages were calculated for each cancer type.

<sup>a</sup>Per-protocol set.

**Table S5.** Prevalence of tBRCAm by family history of cancer

| <b>Medical history</b>               | <b><i>n</i> = 205<sup>a</sup></b> | <b>tBRCA1m<br/><i>n</i> (%)</b> | <b>tBRCA2m<br/><i>n</i> (%)</b> |
|--------------------------------------|-----------------------------------|---------------------------------|---------------------------------|
| Breast cancer                        | 30                                | 12 (40.0)                       | 5 (16.7)                        |
| Ovarian cancer                       | 17                                | 10 (58.8)                       | 3 (17.6)                        |
| Pancreatic cancer                    | 12                                | 2 (16.7)                        | 1 (8.3)                         |
| Prostate cancer                      | 11                                | 1 (9.1)                         | 0                               |
| Other cancer                         | 111                               | 22 (19.8)                       | 13 (11.7)                       |
| Gastric cancer                       | 40                                | 8 (20.0)                        | 7 (17.5)                        |
| Lung neoplasm malignant              | 31                                | 5 (16.1)                        | 4 (12.9)                        |
| Uterine cancer                       | 14                                | 3 (21.4)                        | 1 (7.1)                         |
| Colorectal cancer                    | 14                                | 3 (21.4)                        | 0                               |
| Colon cancer                         | 7                                 | 2 (28.6)                        | 2 (28.6)                        |
| Hepatic cancer                       | 7                                 | 2 (28.6)                        | 0                               |
| Bladder cancer                       | 6                                 | 2 (33.3)                        | 1 (16.7)                        |
| Leukemia                             | 5                                 | 1 (20.0)                        | 0                               |
| Skin cancer                          | 4                                 | 1 (25.0)                        | 0                               |
| Bile duct cancer                     | 4                                 | 0                               | 0                               |
| Lymphoma                             | 4                                 | 0                               | 0                               |
| Cervix carcinoma                     | 3                                 | 1 (33.3)                        | 0                               |
| Renal cancer                         | 3                                 | 1 (33.3)                        | 0                               |
| Esophageal carcinoma                 | 3                                 | 1 (33.3)                        | 0                               |
| Neoplasm malignant                   | 2                                 | 1 (50.0)                        | 1 (50.0)                        |
| Rectal cancer                        | 2                                 | 1 (50.0)                        | 0                               |
| Gallbladder cancer                   | 2                                 | 0                               | 2 (100.0)                       |
| Endometrial cancer                   | 2                                 | 0                               | 0                               |
| Testis cancer                        | 1                                 | 1 (100.0)                       | 0                               |
| Laryngeal cancer                     | 1                                 | 1 (100.0)                       | 0                               |
| Genital neoplasm malignant<br>female | 1                                 | 0                               | 1 (100.0)                       |
| Brain neoplasm                       | 1                                 | 0                               | 0                               |
| Malignant melanoma                   | 1                                 | 0                               | 0                               |
| Osteosarcoma                         | 1                                 | 0                               | 0                               |
| Lip/oral cavity cancer               | 1                                 | 0                               | 0                               |
| Hematopoietic neoplasm               | 1                                 | 0                               | 0                               |

tBRCA, tumor BRCA; *m*, mutation.

Percentages were calculated for each cancer type.

<sup>a</sup>Per-protocol set.

**Table S6.** List of study sites and investigators who participated in the CHRISTELLE study

| <b>Study sites</b>                                                  | <b>Investigators</b> |
|---------------------------------------------------------------------|----------------------|
| Hospital of the University of Occupational and Environmental Health | Hiroshi Harada       |
| Kumamoto University Hospital                                        | Takeshi Motohara     |
| Yamagata University Hospital                                        | Tsuyoshi Ohta        |
| Niigata University Medical & Dental Hospital                        | Kosuke Yoshihara     |
| University of Tsukuba Hospital                                      | Ayumi Shikama        |
| Ehime University Hospital                                           | Takashi Matsumoto    |
| Kansai Rosai Hospital                                               | Kimihiko Ito         |
| Okayama University Hospital                                         | Keiichiro Nakamura   |
| Sapporo Medical University Hospital                                 | Motoki Matsuura      |
| Nara Medical University Hospital                                    | Ryuji Kawaguchi      |
| National Hospital Organization Shikoku Cancer Center                | Kazuhiro Takehara    |
| The University of Tokyo Hospital                                    | Mayuyo Mori          |
| Gifu University Hospital                                            | Saki Murase          |
| Keio University Hospital                                            | Tatsuyuki Chiyoda    |
| Japanese Red Cross Musashino Hospital                               | Satoshi Umezawa      |
| University of Fukui Hospital                                        | Hideaki Tsuyoshi     |
| Shimane University Hospital                                         | Seiya Sato           |
| Kobe City Medical Center General Hospital                           | Nobutaka Hayashi     |
| Tohoku University Hospital                                          | Hideki Tokunaga      |
| Shizuoka Cancer Center                                              | Nobuhiro Kado        |
| The Jikei University Hospital                                       | Nozomu Yanaihara     |
| Fukushima Medical University Hospital                               | Takafumi Watanabe    |
